# Supplementary material for: Synergistic Antiviral Effects of Metal Oxides and Carbon Nanotubes
Source: MDPI journal article supplement (doi:10.3390/ijms231911957), 2022-10-08
Supplement: s1 [file s1]

# Supplementary Information

## **Synergistic Antiviral Effects of Metal Oxides and Carbon Nanotubes**

Indrani Gupta, Samar Azizighannad, Edgardo T. Farinas and Somenath Mitra\*

Department of Chemistry and Environmental Science,

New Jersey Institute of Technology

Newark, NJ, 07102

USA

\* Corresponding Author

Somenath Mitra, 973-596-5611(t), 973-596-3586(F), [somenath.mitra@njit.edu](mailto:somenath.mitra@njit.edu)

## 1. Energy Dispersive X-ray Spectroscopy Studies

The EDS spectra for the MOs and the MO-CNTs have been presented in Figure S1.

Figures S1a-c show the presence of Ni (57.6%) and O (42.4%) bands in  $\text{Ni}(\text{OH})_2$  in

$\text{Ni}(\text{OH})_2$ , Fe (88.7%) and O (11.3%) in  $\text{Fe}_2\text{O}_3$  and Mn (65.1%) and O (34.9) in  $\text{MnO}_2$ .

Similarly, Figures S1d-f represent the MO-CNTs where in  $\text{Ni}(\text{OH})_2$ -CNT (Figure S1d),

Ni is at 15%, O is at 20% and C is at 64%; in  $\text{Fe}_2\text{O}_3$  (Figure S1e) Fe is at 8%, O is at 36%

and C is at 55% and; in  $\text{MnO}_2$  (Figure S1f) Mn is at 9%, O is at 36% and C is at 54%.

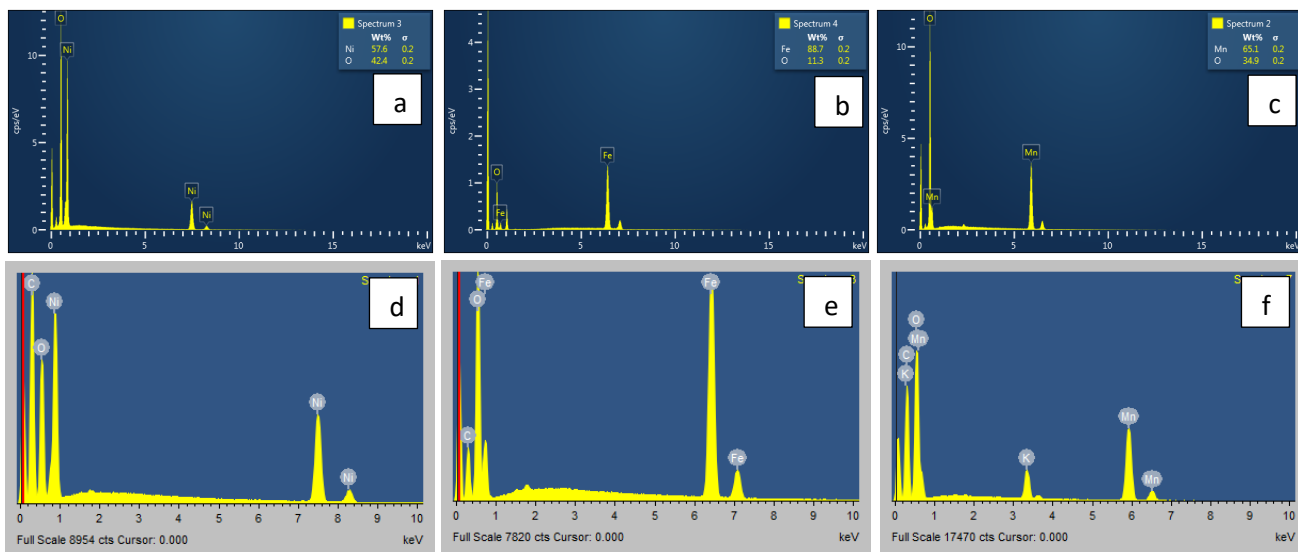

**Figure S1.** EDS spectra of a.  $\text{Ni}(\text{OH})_2$ ; b.  $\text{Fe}_2\text{O}_3$ ; c.  $\text{MnO}_2$ ; d.  $\text{Ni}(\text{OH})_2$ -CNT; e.  $\text{Fe}_2\text{O}_3$ -CNT; f.  $\text{MnO}_2$ -CNT.
